# Supplementary material for: Synthesis, Antimicrobial, and Computational Evaluation of Novel Isobutylchalcones as Antimicrobial Agents
Source: Hindawi journal article supplement (doi:10.1155/2017/6873924), 2017-12-26
Supplement: f1 [file 6873924.f1.pdf]

**Table 3. Experimental and predicted MIC ( $\mu\text{g/mL}$ ) values of training set and test set molecules based on atom based 3D-QSAR model (Antibacterial activity).**

| <b>Compound code</b> | <b><i>B.subtilis</i> MIC (<math>\mu\text{g/mL}</math>)</b> | <b>Experimental <math>-\log(\text{MIC})</math></b> | <b>Predicted <math>-\log(\text{MIC})</math> (Training set)</b> | <b>Predicted <math>-\log(\text{MIC})</math> (Test set)</b> |
|----------------------|------------------------------------------------------------|----------------------------------------------------|----------------------------------------------------------------|------------------------------------------------------------|
| A1                   | 32                                                         | -1.505                                             | -1.74                                                          |                                                            |
| A2                   | 256                                                        | -2.408                                             | -2.11                                                          |                                                            |
| A3                   | 16                                                         | -1.204                                             | -1.19                                                          |                                                            |
| A4                   | 64                                                         | -1.806                                             |                                                                | -1.31                                                      |
| A5                   | 32                                                         | -1.505                                             | -1.50                                                          |                                                            |
| A6                   | 16                                                         | -1.204                                             | -1.29                                                          |                                                            |
| A7                   | 256                                                        | -2.408                                             | -2.44                                                          |                                                            |
| A8                   | 128                                                        | -2.107                                             |                                                                | -2.17                                                      |
| A9                   | 64                                                         | -1.806                                             | -1.71                                                          |                                                            |
| A10                  | 256                                                        | -2.408                                             | -2.34                                                          |                                                            |
| A11                  | 128                                                        | -2.107                                             | -2.07                                                          |                                                            |
| A12                  | 128                                                        | -2.107                                             | -2.10                                                          |                                                            |
| A13                  | 256                                                        | -2.408                                             | -2.47                                                          |                                                            |
| A14                  | 128                                                        | -2.107                                             |                                                                | -2.35                                                      |
| A15                  | 64                                                         | -1.806                                             |                                                                | -1.83                                                      |
| A16                  | 64                                                         | -1.806                                             |                                                                | -1.93                                                      |
| A17                  | 64                                                         | -1.806                                             | -1.71                                                          |                                                            |
| A18                  | 128                                                        | -2.107                                             | -2.05                                                          |                                                            |
| A19                  | 128                                                        | -2.107                                             | -2.06                                                          |                                                            |
| A20                  | 64                                                         | -1.806                                             |                                                                | -2.04                                                      |
| A21                  | 256                                                        | -2.408                                             | -2.50                                                          |                                                            |
| A22                  | 128                                                        | -2.107                                             |                                                                | -2.03                                                      |
| A23                  | 256                                                        | -2.408                                             | -2.43                                                          |                                                            |
| A24                  | 264                                                        | -2.422                                             | -2.48                                                          |                                                            |
| A25                  | 64                                                         | -1.806                                             | -1.95                                                          |                                                            |

**Table 4. Experimental and predicted MIC ( $\mu\text{g/mL}$ ) values of training set and test set molecules based on atom based 3D-QSAR model (Antibacterial activity).**

| <b>Compound code</b> | <b><i>S. aureus</i> MIC (<math>\mu\text{g/mL}</math>)</b> | <b>Experimental <math>-\log(\text{MIC})</math></b> | <b>Predicted <math>-\log(\text{MIC})</math> (Training set)</b> | <b>Predicted <math>-\log(\text{MIC})</math> (Test set)</b> |
|----------------------|-----------------------------------------------------------|----------------------------------------------------|----------------------------------------------------------------|------------------------------------------------------------|
| A1                   | 32                                                        | -1.50515                                           | -1.55                                                          |                                                            |
| A2                   | 128                                                       | -2.10721                                           | -1.94                                                          |                                                            |
| A3                   | 16                                                        | -1.20412                                           | -1.26                                                          |                                                            |
| A4                   | 64                                                        | -1.80618                                           | -1.78                                                          |                                                            |
| A5                   | 32                                                        | -1.50515                                           | -1.71                                                          |                                                            |
| A6                   | 16                                                        | -1.20412                                           | -1.26                                                          |                                                            |
| A7                   | 128                                                       | -2.10721                                           |                                                                | -2.2                                                       |
| A8                   | 128                                                       | -2.10721                                           | -1.91                                                          |                                                            |
| A9                   | 64                                                        | -1.80618                                           |                                                                | -1.95                                                      |
| A10                  | 256                                                       | -2.40824                                           | -2.27                                                          |                                                            |
| A11                  | 64                                                        | -1.80618                                           | -1.71                                                          |                                                            |
| A12                  | 128                                                       | -2.10721                                           |                                                                | -2.02                                                      |
| A13                  | 128                                                       | -2.10721                                           |                                                                | -2.28                                                      |
| A14                  | 128                                                       | -2.10721                                           | -2.08                                                          |                                                            |
| A15                  | 128                                                       | -2.10721                                           | -2.18                                                          |                                                            |
| A16                  | 128                                                       | -2.10721                                           |                                                                | -1.95                                                      |
| A17                  | 128                                                       | -2.10721                                           | -2.04                                                          |                                                            |
| A18                  | 256                                                       | -2.40824                                           | -2.5                                                           |                                                            |
| A19                  | 256                                                       | -2.40824                                           | -2.48                                                          |                                                            |
| A20                  | 128                                                       | -2.10721                                           |                                                                | -2.05                                                      |
| A21                  | 256                                                       | -2.40824                                           | -2.43                                                          |                                                            |
| A22                  | 256                                                       | -2.40824                                           | -2.33                                                          |                                                            |
| A23                  | 128                                                       | -2.10721                                           |                                                                | -2.25                                                      |
| A24                  | 128                                                       | -2.10721                                           | -2.3                                                           |                                                            |
| A25                  | 64                                                        | -1.80618                                           |                                                                | -1.55                                                      |

**Table 5. Experimental and predicted MIC ( $\mu\text{g/mL}$ ) values of training set and test set molecules based on atom based 3D-QSAR model (Antibacterial activity).**

| <b>Compound code</b> | <b><i>E. coli</i> MIC (<math>\mu\text{g/mL}</math>)</b> | <b>Experimental <math>-\log(\text{MIC})</math></b> | <b>Predicted <math>-\log(\text{MIC})</math> (Training set)</b> | <b>Predicted <math>-\log(\text{MIC})</math> (Test set)</b> |
|----------------------|---------------------------------------------------------|----------------------------------------------------|----------------------------------------------------------------|------------------------------------------------------------|
| A1                   | 64                                                      | -1.806                                             | -1.82                                                          |                                                            |
| A2                   | 128                                                     | -2.107                                             | -2.37                                                          |                                                            |
| A3                   | 16                                                      | -1.204                                             |                                                                | -1.42                                                      |
| A4                   | 128                                                     | -2.107                                             | -1.99                                                          |                                                            |
| A5                   | 64                                                      | -1.806                                             | -1.76                                                          |                                                            |
| A6                   | 16                                                      | -1.204                                             | -1.50                                                          |                                                            |
| A7                   | 256                                                     | -2.408                                             |                                                                | -2.64                                                      |
| A8                   | 128                                                     | -2.107                                             |                                                                | -2.32                                                      |
| A9                   | 64                                                      | -1.806                                             | -1.75                                                          |                                                            |
| A10                  | 128                                                     | -2.107                                             | -2.34                                                          |                                                            |
| A11                  | 64                                                      | -1.806                                             |                                                                | -1.78                                                      |
| A12                  | 256                                                     | -2.408                                             | -2.26                                                          |                                                            |
| A13                  | 256                                                     | -2.408                                             | -2.35                                                          |                                                            |
| A14                  | 128                                                     | -2.107                                             | -2.31                                                          |                                                            |
| A15                  | 64                                                      | -1.806                                             |                                                                | -1.71                                                      |
| A16                  | 128                                                     | -2.107                                             | -2.12                                                          |                                                            |
| A17                  | 128                                                     | -2.107                                             | -1.86                                                          |                                                            |
| A18                  | 128                                                     | -2.107                                             |                                                                | -2.46                                                      |
| A19                  | 256                                                     | -2.408                                             | -2.28                                                          |                                                            |
| A20                  | 64                                                      | -1.806                                             | -1.75                                                          |                                                            |
| A21                  | 64                                                      | -1.806                                             | -1.79                                                          |                                                            |
| A22                  | 128                                                     | -2.107                                             |                                                                | -2.32                                                      |
| A23                  | 128                                                     | -2.107                                             |                                                                | -2.29                                                      |
| A24                  | 64                                                      | -1.806                                             | -1.92                                                          |                                                            |
| A25                  | 32                                                      | -1.505                                             | -1.43                                                          |                                                            |

**Table 6. Experimental and predicted MIC ( $\mu\text{g/mL}$ ) values of training set and test set molecules based on atom based 3D-QSAR model (Antibacterial activity).**

| <b>Compound code</b> | <b><i>P. vulgaris</i> MIC (<math>\mu\text{g/mL}</math>)</b> | <b>Experimental <math>-\log(\text{MIC})</math></b> | <b>Predicted <math>-\log(\text{MIC})</math> (Training set)</b> | <b>Predicted <math>-\log(\text{MIC})</math> (Test set)</b> |
|----------------------|-------------------------------------------------------------|----------------------------------------------------|----------------------------------------------------------------|------------------------------------------------------------|
| A1                   | 64                                                          | -1.806                                             |                                                                | -1.826                                                     |
| A2                   | 128                                                         | -2.107                                             |                                                                | -2.35                                                      |
| A3                   | 16                                                          | -1.204                                             | -1.48                                                          |                                                            |
| A4                   | 128                                                         | -2.107                                             | -1.95                                                          |                                                            |
| A5                   | 64                                                          | -1.806                                             | -1.78                                                          |                                                            |
| A6                   | 16                                                          | -1.204                                             | -1.52                                                          |                                                            |
| A7                   | 256                                                         | -2.408                                             | -2.22                                                          |                                                            |
| A8                   | 128                                                         | -2.107                                             |                                                                | -2.21                                                      |
| A9                   | 64                                                          | -1.806                                             | -1.75                                                          |                                                            |
| A10                  | 256                                                         | -2.408                                             | -2.48                                                          |                                                            |
| A11                  | 128                                                         | -2.107                                             | -2.31                                                          |                                                            |
| A12                  | 128                                                         | -2.107                                             |                                                                | -2.31                                                      |
| A13                  | 128                                                         | -2.107                                             |                                                                | -2.39                                                      |
| A14                  | 256                                                         | -2.408                                             | -2.38                                                          |                                                            |
| A15                  | 128                                                         | -2.107                                             | -2.21                                                          |                                                            |
| A16                  | 64                                                          | -1.806                                             | -1.75                                                          |                                                            |
| A17                  | 64                                                          | -1.806                                             | -1.89                                                          |                                                            |
| A18                  | 256                                                         | -2.408                                             | -2.46                                                          |                                                            |
| A19                  | 256                                                         | -2.408                                             | -2.26                                                          |                                                            |
| A20                  | 128                                                         | -2.107                                             | -2.15                                                          |                                                            |
| A21                  | 64                                                          | -1.806                                             |                                                                | -1.86                                                      |
| A22                  | 128                                                         | -2.107                                             | -2.18                                                          |                                                            |
| A23                  | 256                                                         | -2.408                                             |                                                                | -2.28                                                      |
| A24                  | 64                                                          | -1.806                                             |                                                                | -1.69                                                      |
| A25                  | 32                                                          | -1.505                                             | -1.68                                                          |                                                            |

**Table 7. Experimental and predicted MIC ( $\mu\text{g/mL}$ ) values of training set and test set molecules based on atom based 3D-QSAR model (Antifungal activity).**

| <b>Compound code</b> | <b><i>A. niger</i> MIC (<math>\mu\text{g/mL}</math>)</b> | <b>Experimental <math>-\log(\text{MIC})</math></b> | <b>Predicted <math>-\log(\text{MIC})</math> (Training set)</b> | <b>Predicted <math>-\log(\text{MIC})</math> (Test set)</b> |
|----------------------|----------------------------------------------------------|----------------------------------------------------|----------------------------------------------------------------|------------------------------------------------------------|
| A1                   | 32                                                       | -1.505                                             | -1.51                                                          |                                                            |
| A2                   | 256                                                      | -2.408                                             | -2.42                                                          |                                                            |
| A3                   | 16                                                       | -1.204                                             | -1.21                                                          |                                                            |
| A4                   | 64                                                       | -1.806                                             |                                                                | -1.44                                                      |
| A5                   | 16                                                       | -1.204                                             | -1.21                                                          |                                                            |
| A6                   | 16                                                       | -1.204                                             | -1.19                                                          |                                                            |
| A7                   | 128                                                      | -2.107                                             | -2.08                                                          |                                                            |
| A8                   | 64                                                       | -1.806                                             |                                                                | -1.64                                                      |
| A9                   | 128                                                      | -2.107                                             | -2.02                                                          |                                                            |
| A10                  | 128                                                      | -2.107                                             | -2.16                                                          |                                                            |
| A11                  | 64                                                       | -1.806                                             | -1.81                                                          |                                                            |
| A12                  | 32                                                       | -1.505                                             | -1.50                                                          |                                                            |
| A13                  | 64                                                       | -1.806                                             |                                                                | -1.35                                                      |
| A14                  | 32                                                       | -1.505                                             | -1.55                                                          |                                                            |
| A15                  | 32                                                       | -1.505                                             | -1.47                                                          |                                                            |
| A16                  | 64                                                       | -1.806                                             |                                                                | -1.51                                                      |
| A17                  | 32                                                       | -1.505                                             | -1.56                                                          |                                                            |
| A18                  | 64                                                       | -1.806                                             |                                                                | -1.44                                                      |
| A19                  | 32                                                       | -1.505                                             | -1.49                                                          |                                                            |
| A20                  | 64                                                       | -1.806                                             |                                                                | -1.54                                                      |
| A21                  | 64                                                       | -1.806                                             |                                                                | -2.18                                                      |
| A22                  | 32                                                       | -1.505                                             | -1.51                                                          |                                                            |
| A23                  | 128                                                      | -2.107                                             | -2.14                                                          |                                                            |
| A24                  | 64                                                       | -1.806                                             | -1.78                                                          |                                                            |
| A25                  | 64                                                       | -1.806                                             |                                                                | -1.56                                                      |

**Table 8. Experimental and predicted MIC ( $\mu\text{g/mL}$ ) values of training set and test set molecules based on atom based 3D-QSAR model (Antifungal activity).**

| <b>Compound code</b> | <b><i>C. tropicalis</i> MIC (<math>\mu\text{g/mL}</math>)</b> | <b>Experimental <math>-\log(\text{MIC})</math></b> | <b>Predicted <math>-\log(\text{MIC})</math> (Training set)</b> | <b>Predicted <math>-\log(\text{MIC})</math> (Test set)</b> |
|----------------------|---------------------------------------------------------------|----------------------------------------------------|----------------------------------------------------------------|------------------------------------------------------------|
| A1                   | 64                                                            | -1.806                                             | -1.959                                                         |                                                            |
| A2                   | 256                                                           | -2.408                                             | -2.52                                                          |                                                            |
| A3                   | 16                                                            | -1.204                                             |                                                                | -1.31                                                      |
| A4                   | 64                                                            | -1.806                                             |                                                                | -1.99                                                      |
| A5                   | 32                                                            | -1.505                                             | -1.47                                                          |                                                            |
| A6                   | 16                                                            | -1.204                                             | -1.31                                                          |                                                            |
| A7                   | 64                                                            | -1.806                                             | -1.99                                                          |                                                            |
| A8                   | 128                                                           | -2.107                                             |                                                                | -2.32                                                      |
| A9                   | 128                                                           | -2.107                                             | -2.35                                                          |                                                            |
| A10                  | 64                                                            | -1.806                                             |                                                                | -1.68                                                      |
| A11                  | 64                                                            | -1.806                                             | -2.01                                                          |                                                            |
| A12                  | 16                                                            | -1.204                                             | -1.46                                                          |                                                            |
| A13                  | 128                                                           | -2.107                                             | -2.36                                                          |                                                            |
| A14                  | 32                                                            | -1.505                                             | -1.45                                                          |                                                            |
| A15                  | 64                                                            | -1.806                                             | -2.04                                                          |                                                            |
| A16                  | 128                                                           | -2.107                                             | -2.25                                                          |                                                            |
| A17                  | 16                                                            | -1.204                                             | -1.42                                                          |                                                            |
| A18                  | 32                                                            | -1.505                                             |                                                                | -1.59                                                      |
| A19                  | 64                                                            | -1.806                                             | -1.93                                                          |                                                            |
| A20                  | 32                                                            | -1.505                                             | -1.64                                                          |                                                            |
| A21                  | 128                                                           | -2.107                                             |                                                                | -2.34                                                      |
| A22                  | 32                                                            | -1.505                                             | -1.45                                                          |                                                            |
| A23                  | 64                                                            | -1.806                                             |                                                                | -1.98                                                      |
| A24                  | 32                                                            | -1.505                                             | -1.45                                                          |                                                            |
| A25                  | 32                                                            | -1.505                                             |                                                                | -1.72                                                      |
